# Supplementary material
Source: PubMed Central journal article supplement (PMC3528543)
Supplement: 1214024109_sapp.pdf [file 1214024109_sapp.pdf]

# Dual-acting riboswitch control of translation initiation and mRNA decay

**Marie-Pier Caron<sup>‡†</sup>, Laurène Bastet<sup>†</sup>, Antony Lussier<sup>†</sup>, Maxime Simoneau-Roy<sup>‡†</sup>, Eric Massé<sup>‡¶</sup> and Daniel A. Lafontaine<sup>†¶</sup>**

<sup>†</sup>Département de biologie, Faculté des sciences, Groupe ARN/RNA Group, Université de Sherbrooke, Sherbrooke, Québec, Canada, J1K 2R1 and <sup>‡</sup>Département de biochimie, Faculté de médecine et des sciences de la santé, Groupe ARN/RNA Group, Université de Sherbrooke, Sherbrooke, Québec, Canada, J1E 4K8.

Keywords: gene regulation, mRNA decay, translational control, RNA degradosome.

<sup>¶</sup>To whom correspondence should be addressed. Eric Massé: Tel. 819-346-1110, ext: 75475, Fax. 819-564-5340, E-mail: Eric.Masse@USherbrooke.ca or Daniel Lafontaine: Tel. 819-821-8000, ext: 65011, Fax. 819-821-8049, E-mail: Daniel.Lafontaine@USherbrooke.ca

## Supporting Information

### SI Materials and Methods

#### Strains and plasmids

Strains used in all experiments were derivatives of *E. coli* MG1655 (see Table S1). The *E. coli* strain DH5 $\alpha$  was used for routine cloning procedures. The deletion/insertion mutations in *lysC* were performed by a method described previously (1). Chloramphenicol resistance cassette was amplified from strain EM1047 by PCR with sequences homologous of *lysC* (EM1742-EM1743). The resulting PCR product was electroporated into EM1237 after induction of  $\lambda$ *red* system (1) and selecting for chloramphenicol resistance (30  $\mu$ g/ml). The recombinant product was verified by PCR. Then, the resulting plasmid pBAD-*lysC* (EM1339-EM1729) (MPC70) and pBAD-*lysC*- $\Delta$ Site1 (MPC66) (PCR1: EM1729-EM1684, PCR2: EM1683-EM1339; PCR1 and PCR2 serve as DNA template for PCR3 which was amplified using primers EM1729-EM1339) were digested with EcoR1 and MSC1, cloned in PNM12 (pBAD24 derivative) and selected by ampicillin at 50  $\mu$ g/ml. Strains constructed by phage P1 transduction were selected with appropriate antibiotic-resistant markers.

The *lysC* translational and transcriptional *lacZ* fusions, containing the riboswitch domain with the first 57 nucleotides of *lysC* ORF, were constructed with the PM1205 strain (2). Briefly, cells were heat-shocked to activate the  $\lambda$ *red* recombination system as described previously (2). Then, cells were electroporated with a PCR product, which produced a chromosomal insertion by homologous recombination. The PCR product for the *lysC-lacZ* translational fusion (MPC7) was prepared with oligonucleotides EM845 and EM908 from the genomic DNA. The *lysC-lacZ* transcriptional fusion (MPC16) harboring a translation stop in the *lysC* ORF was constructed with a four-step PCR amplification. The PCR1 (EM908-EM844) was performed from genomic DNA to serve as a template for the PCR2 (EM991-EM992) and PCR3 (EM993-EM994). Then the PCR4 was prepared with the products of PCR2 and PCR3 with the oligonucleotides EM991 and EM994 (see Table S3). The transcriptional *lacZ* fusions of the ON and OFF mutants of the *lysC* riboswitch were also prepared by four-step PCR amplifications (see Table S3). The *lysC* promoter fusions to *lacZ* P<sub>1 $lysC$</sub> P<sub>2 $lysC$</sub> -*lacZ* (MPC29) and P<sub>2 $lysC$</sub> -*lacZ* (MPC30) were constructed with a three-step PCR amplification. Briefly, PCR1 and PCR2 were performed from the genomic DNA and the PCR3 was performed with the products of PCR1 and PCR2 (see Table S3). To construct other mutants, all PCR were performed with three-step PCR amplifications from the wild type *lysC-lacZ* fusions. Then, the PCR1 and PCR2 served as DNA template for the PCR3. The *thiM lacZ* fusions were constructed as described for the *lysC* fusion (see Table S3). All obtained *lacZ* fusions were sequenced to ensure the integrity of the constructs.

#### 3' rapid amplification of cDNA ends (RACE)

Total RNA was extracted with the hot phenol method (3) and 20  $\mu$ g of RNA was treated with 8 U of Turbo DNase (Ambion) for 30 min at 37°C. RNA was extracted by phenol-chloroform-isoamyl and precipitated with ethanol. Then, the RNA was polyadenylated with 4 U of Poly-(A) Polymerase following the manufacturer's protocol (Ambion). The RNA was extracted again with phenol-chloroform-isoamyl and precipitated with ethanol. A reverse transcription was performed with SuperScript II (Invitrogen) and the poly-dT oligonucleotide EM1363. The resulting cDNA was used as template in a PCR reaction using oligonucleotides EM656-EM1364. The PCR

product was cloned using the Zero Blunt TOPO kit (Invitrogen) and sequenced. At least three independent experiments were carried out.

### ***In vitro* RNA synthesis**

RNA was transcribed *in vitro* with purified T7 RNA polymerase from PCR product (see Table S4 for oligonucleotides used to generate DNA templates). The reaction was performed in transcription buffer (40 mM Tris-HCl pH 8.0, 0.01% triton, 20 mM MgCl<sub>2</sub>, 2 mM spermidine), 2.5 mM NTPs (ATP, CTP, GTP and UTP), 1 mM DTT, 10 pmol DNA template and 10 μg of T7 polymerase. The mixture was incubated for 3h at 37°C. The synthesized RNA was extracted by phenol-chloroform-isoamyl alcohol, precipitated with ethanol and purified using a 4% polyacrylamide 8M urea gel.

Radiolabeled probes used for Northern blot analysis were transcribed using a transcription buffer (400 mM Hepes-KOH pH 7.5, 120 mM MgCl<sub>2</sub>, 200 mM DTT, 10 mM spermidine), 400 μM NTPs (ATP, CTP and GTP), 10 μM UTP, 3 μl of α-<sup>32</sup>P-UTP (3000 Ci/mmol), 20 U RNase OUT (Invitrogen) and 1 μg of DNA template. After 4h of incubation at 37°C, 2 U of Turbo DNase (Ambion) was added for 15 min. The labeled RNA was extracted by phenol-chloroform-isoamyl and purified with a G-50 Sephadex column to remove free nucleotides. See Table S3 for oligonucleotides used to generate DNA templates.

### **References**

1. Yu D, *et al.* (2000) An efficient recombination system for chromosome engineering in *Escherichia coli*. (Translated from eng) *Proc Natl Acad Sci U S A* 97(11):5978-5983 (in eng).
2. Mandin P & Gottesman S (2009) A genetic approach for finding small RNAs regulators of genes of interest identifies RybC as regulating the DpiA/DpiB two-component system. (Translated from eng) *Mol Microbiol* 72(3):551-565 (in eng).
3. Aiba H, Adhya S, & de Crombrughe B (1981) Evidence for two functional gal promoters in intact *Escherichia coli* cells. (Translated from eng) *J Biol Chem* 256(22):11905-11910 (in eng).
4. Cassan M, Ronceray J, & Patte JC (1983) Nucleotide sequence of the promoter region of the *E. coli* lysC gene. (Translated from eng) *Nucleic Acids Res* 11(18):6157-6166 (in eng).
5. Liao HH & Hseu TH (1998) Analysis of the regulatory region of the lysC gene of *Escherichia coli*. *FEMS Microbiol Lett* 168(1):31-36.
6. Blouin S, Chinnappan R, & Lafontaine DA (2010) Folding of the lysine riboswitch: importance of peripheral elements for transcriptional regulation. (Translated from Eng) *Nucleic Acids Res* 39(8):3373-3387 (in Eng).
7. Sudarsan N, Wickiser JK, Nakamura S, Ebert MS, & Breaker RR (2003) An mRNA structure in bacteria that controls gene expression by binding lysine. *Genes Dev* 17(21):2688-2697.
8. Vold B, Szulmajster J, & Carbone A (1975) Regulation of dihydrodipicolinate synthase and aspartate kinase in *Bacillus subtilis*. *J Bacteriol* 121(3):970-974.
9. Apirion D & Lassar AB (1978) A conditional lethal mutant of *Escherichia coli* which affects the processing of ribosomal RNA. (Translated from eng) *J Biol Chem* 253(5):1738-1742 (in eng).

10. Wachi M, Takada A, & Nagai K (1999) Overproduction of the outer-membrane proteins FepA and FhuE responsible for iron transport in *Escherichia coli* hfq::cat mutant. (Translated from eng) *Biochem Biophys Res Commun* 264(2):525-529 (in eng).
11. Schuwirth BS, *et al.* (2006) Structural analysis of kasugamycin inhibition of translation. (Translated from eng) *Nat Struct Mol Biol* 13(10):879-886 (in eng).
12. Majdalani N, Cuning C, Sledjeski D, Elliott T, & Gottesman S (1998) DsrA RNA regulates translation of RpoS message by an anti-antisense mechanism, independent of its action as an antisilencer of transcription. (Translated from eng) *Proc Natl Acad Sci U S A* 95(21):12462-12467 (in eng).
13. Masse E, Escorcia FE, & Gottesman S (2003) Coupled degradation of a small regulatory RNA and its mRNA targets in *Escherichia coli*. (Translated from eng) *Genes Dev* 17(19): 2374-2383 (in eng).
14. Masse E & Gottesman S (2002) A small RNA regulates the expression of genes involved in iron metabolism in *Escherichia coli*. (Translated from eng) *Proc Natl Acad Sci U S A* 99(7):4620-4625 (in eng).

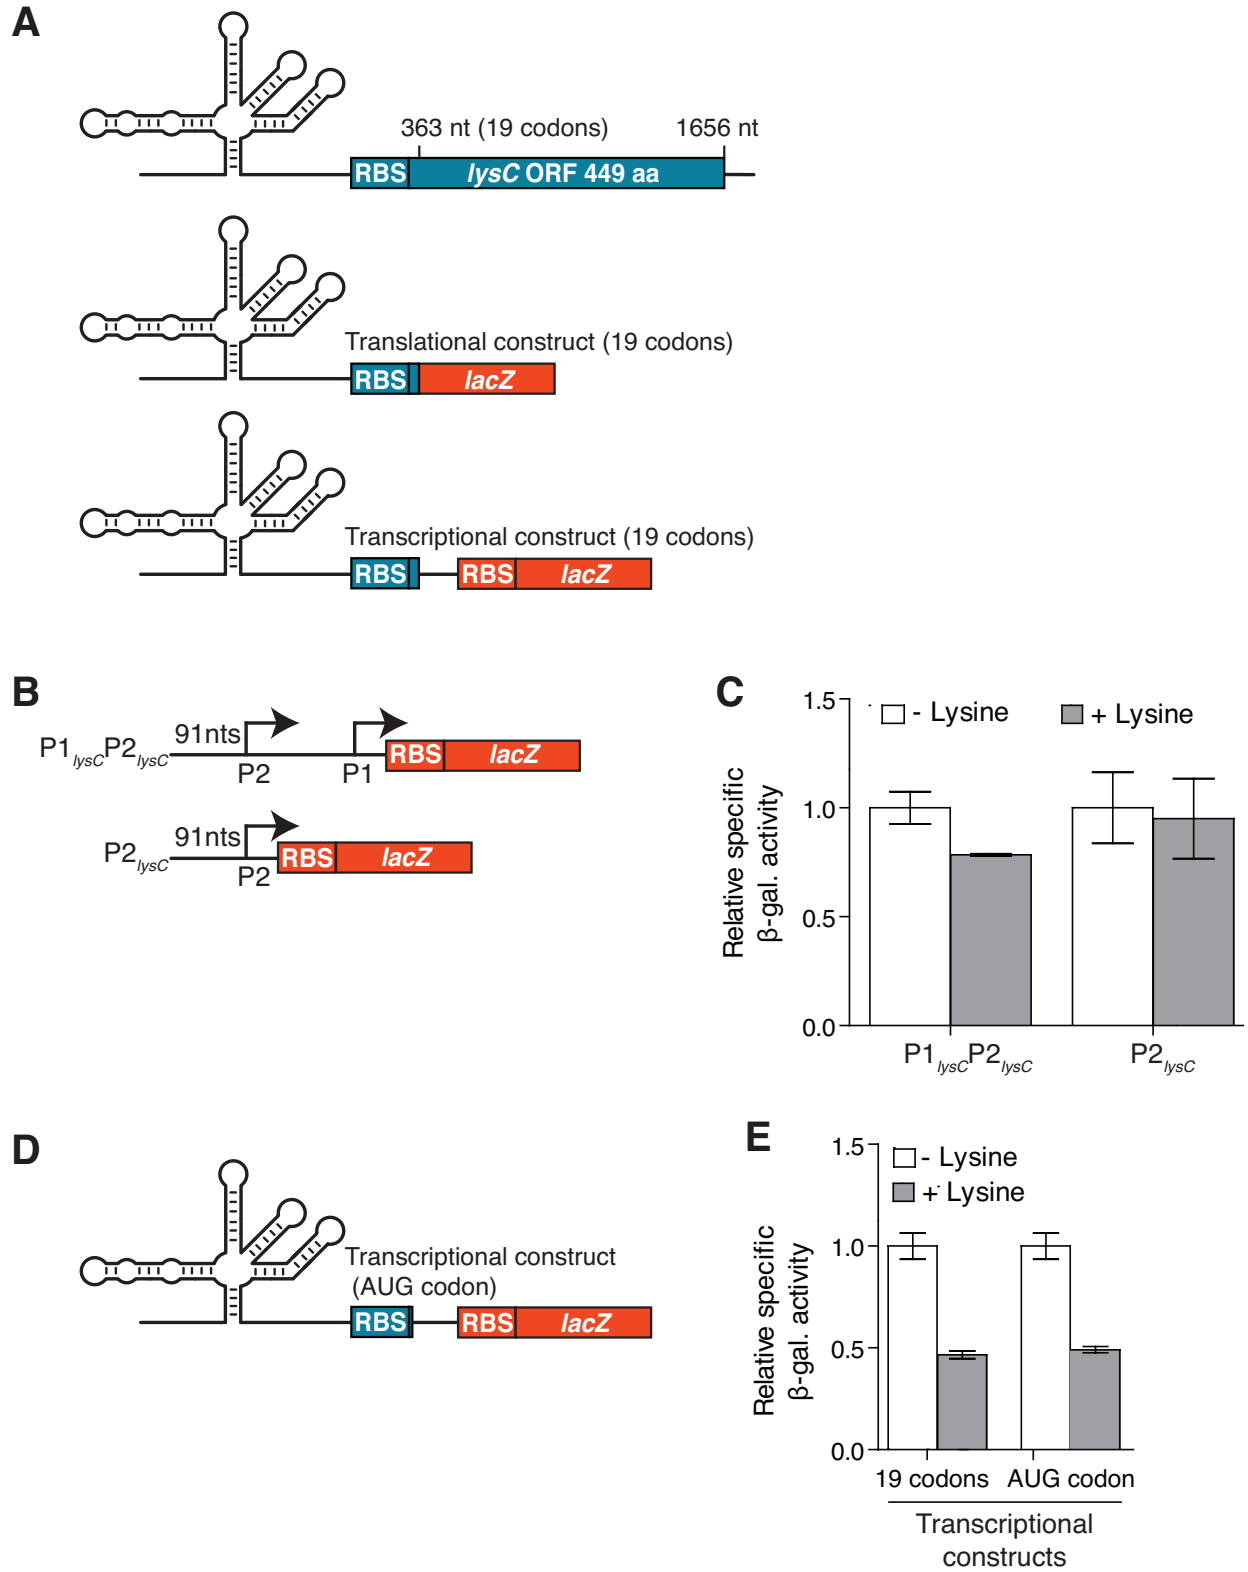

**Fig. S1.** Influence of lysine on the regulatory activity of the *lysC* riboswitch.

(A) Schematic of the wild-type *lysC* mRNA (top) compared with translational (middle) and transcriptional (bottom) fusions. Both fusions are expressed from an arabinose inducible promoter ( $P_{BAD}$ ) that is fused to the *lysC* riboswitch domain encompassing positions +1 to +363, relatively to the P1 transcription start site (4), which therefore contains 57 nucleotides (19 codons) of the *lysC* ORF. In the case of the transcriptional fusion, because translation initiation of *lacZ* is performed from its own RBS which is not modulated by the riboswitch upon lysine binding, the expression of *lacZ* is thus strictly dependent on the level of *lysC* mRNA.

(B) Schematic representation of constructs used in  $\beta$ -galactosidase assays to monitor the expression of the *lysC* promoter region. Constructs  $P1_{lysC}P2_{lysC}$  and  $P2_{lysC}$  contained regions encompassing positions -80 to +105 and -80 to -12, respectively, relatively to the P2 transcription start site (4, 5). While the fused reporter *lacZ* gene in  $P1_{lysC}P2_{lysC}$  construct starts at position +105 (13 nucleotides after the promoter P1), the *lacZ* gene starts at position +12 after the promoter P2 in the  $P2_{lysC}$  construct. The identification of both promoters is based on previous studies (4, 5).

(C)  $\beta$ -galactosidase assays of  $P1_{lysC}P2_{lysC}$  and  $P2_{lysC}$  *lacZ* fusions. Enzymatic activities were measured in absence and presence of 10  $\mu$ g/ml lysine. Values were normalized to enzymatic activity obtained in absence of lysine. The average values of three independent experiments with standard deviations are shown. While the expression of the  $P2_{lysC}$  promoter is not affected by the presence of lysine, the expression of the  $P1_{lysC}P2_{lysC}$  promoter is decreased by  $\sim 22\%$  with lysine suggesting that the P1 promoter is modulated to some degree by lysine. This extent of promoter regulation is significantly less than what was observed using the riboswitch domain ( $\sim 70\%$  decrease, Fig. 1B and C).

(D) Schematic representation of the transcriptional *lysC-lacZ* fusion construct containing only the AUG start codon of *lysC* ORF.

(E)  $\beta$ -galactosidase assays of transcriptional *lysC-lacZ* fusions containing 19 codons or only the AUG start codon of *lysC* ORF. Enzymatic activities were measured in absence and presence of 10  $\mu$ g/ml lysine. Values were normalized to the activity obtained in absence of lysine.

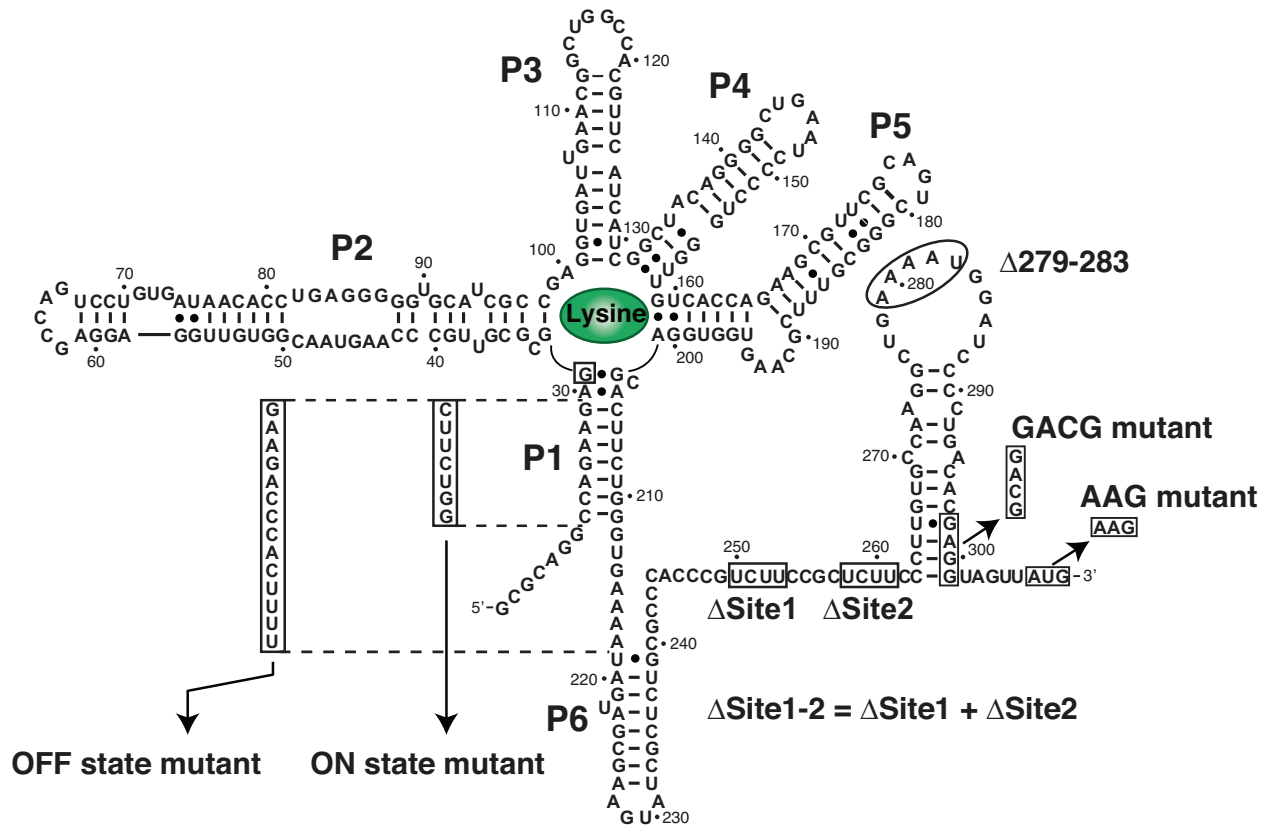

**Fig. S2.** Secondary structure of the wild-type lysine riboswitch and mutants used in this study.

The secondary structure of the *lysC* riboswitch is shown in the predicted ligand-bound conformation (OFF state). Based on the riboswitch regulation model (Fig. 1A), ligand binding to the riboswitch induces the formation of the P1 stem, which is important for the adoption of the OFF state (6). Mutations introduced in the P1 stem to favor the ON or OFF state are shown. The G31C mutation previously shown to inhibit ligand binding is shown in a box at position 31 (6-8). The ribosome binding site (RBS; positions 298-301) and the AUG start codon (positions 307-309) are indicated. Deleted sequences to generate mutants  $\Delta \text{Site1}$ ,  $\Delta \text{Site2}$  and  $\Delta 279-283$  are shown. The  $\Delta \text{Site1-2}$  mutant was generated by incorporating both  $\Delta \text{Site1}$  and  $\Delta \text{Site2}$  mutations. The numbering and nomenclature of the *lysC* riboswitch are based from previous studies (7).

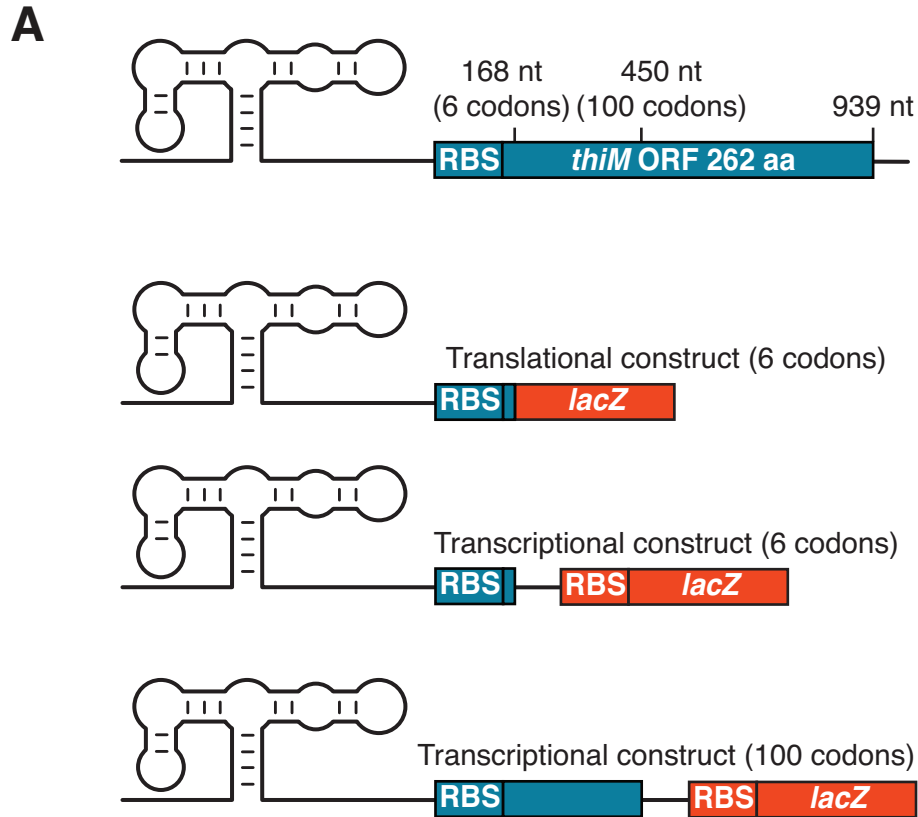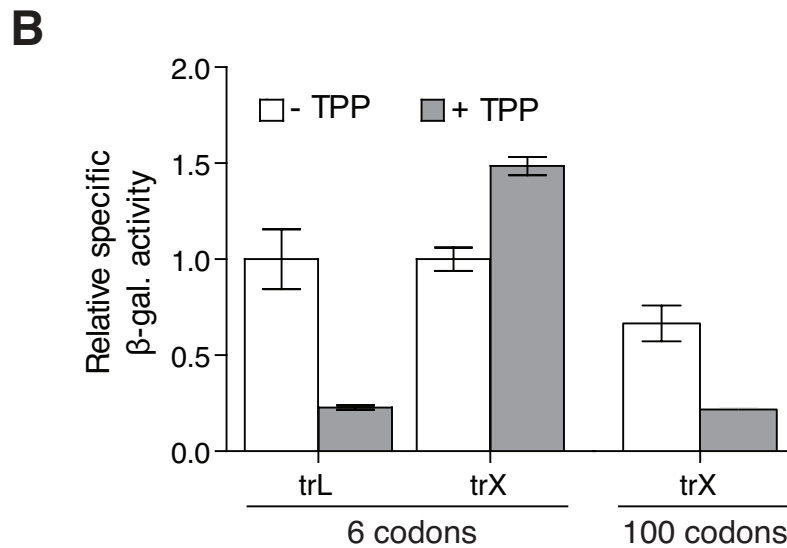

**Fig. S3.** Genetic control of the *E. coli thiM* riboswitch.

(A) Schematic description of translational and transcriptional  $\beta$ -galactosidase constructs used to monitor *thiM* expression. These constructs are expressed from an arabinose-inducible promoter that is fused to the *thiM* riboswitch domain encompassing various lengths of *thiM* ORF (6 or 100 codons). In the case of the transcriptional fusion, the expression of *lacZ* strictly depends on the level of *thiM* mRNA.



(B)  $\beta$ -galactosidase assays of translational (trL: ThiM-LacZ) and transcriptional (trX: *thiM-lacZ*) fusions. Cells were grown in M63 medium with 0.2% glycerol to mid-log phase and induced with arabinose (0.1% final). Enzymatic activities were measured in absence and presence of 500  $\mu$ g/ml TPP. Values were normalized to enzymatic activity obtained in absence of TPP (6 codons). The average values of three independent experiments with standard deviations are shown.

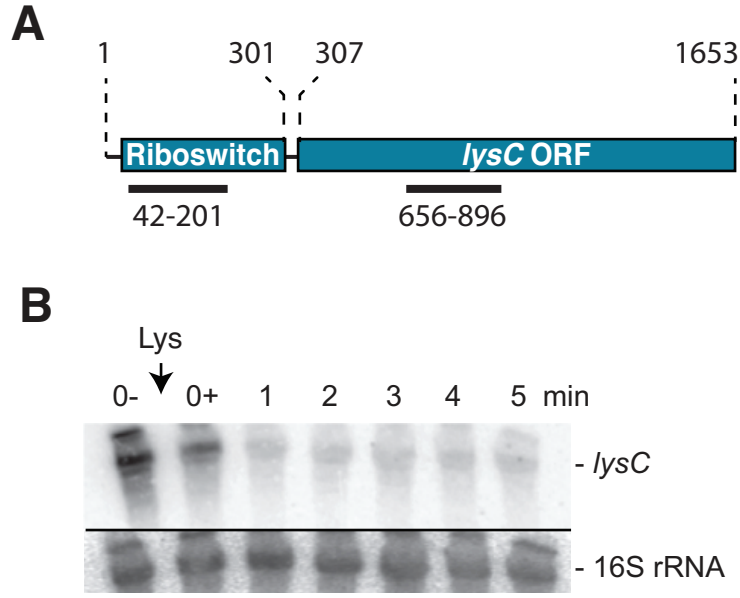

**Fig. S4.** Northern blot analysis of the *lysC* mRNA.

(A) Localization of RNA probes used for Northern blots. The lysine riboswitch (positions 1-301) and the *lysC* ORF (positions 307-1653) are delimited by dotted lines. RNA probes designed to target the riboswitch (positions 42-201) and ORF domains (positions 656-896) are indicated by black horizontal lines.

(B) Northern blot analysis of the *lysC* mRNA using a probe targeting the ORF domain. Wild-type *E. coli* strain MG1655 was grown to mid-log phase in M63 minimal medium with 0.2% glucose at 37°C and total RNA was extracted at the indicated times immediately before (0-) and after (0+) addition of lysine (10 μg/ml). The probe was designed to detect the ORF region (positions 656-896) of the *lysC* mRNA. The 16S rRNA was used as a loading control.

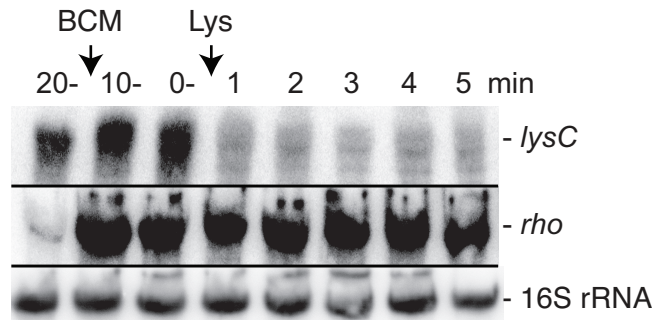

**Fig. S5.** Investigation of the Rho transcription factor in the lysine-dependent *lysC* mRNA regulation.

Northern blot analysis of the *lysC* mRNA in presence of bicyclomycin. Wild-type *E. coli* strain MG1655 was grown to mid-log phase in M63 minimal medium with 0.2% glucose at 37°C and total RNA was extracted at the indicated times. Bicyclomycin (BCM, 20  $\mu\text{g/ml}$ ) was added 20 min before the addition of lysine (10  $\mu\text{g/ml}$ ). Negative time points are relativized to the addition of lysine. The addition of BCM does not prevent the lysine-induced mRNA decrease of *lysC*, consistent with Rho not being involved in the regulation of *lysC*. As a control, a strong BCM effect on the level *rho* mRNA is observed, in agreement with Rho autoregulation mechanism. Probes were designed to detect the *lysC* riboswitch region (positions 42 to 201; Fig. S4A) and positions 256 to 455 of *rho* mRNA (relatively to the transcription start site). The 16S rRNA was used as a loading control.

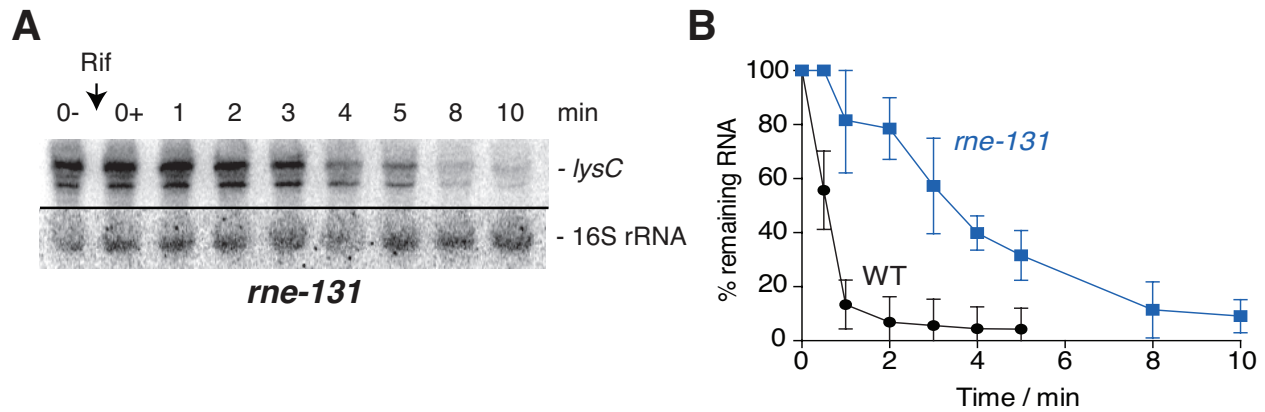

**Fig. S6.** Determination of the *lysC* mRNA stability in the context of the *rne-131* strain.

(A) Northern blot analysis of the *lysC* mRNA level in the context of the *rne-131* strain. The *E. coli* strain *rne-131* was grown to mid-log phase in M63 minimal medium with 0.2% glucose at 37°C and total RNA was isolated at the indicated times immediately before (0-) and after (0+) addition of rifampicin (250  $\mu$ g/ml). The 16S rRNA was used as a loading control.

(B) Quantification analysis of Northern blots shown in panel (A) and Fig. 1F. The average values of three independent experiments with standard deviations are shown.

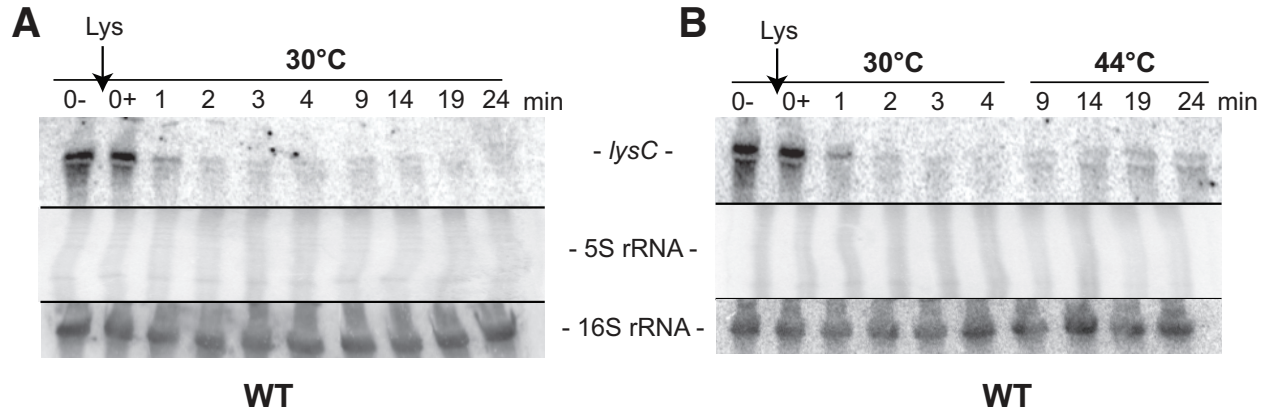

**Fig. S7.** Northern blot analysis of the *lysC* mRNA at 30°C and 44°C.

(A) Northern blot analysis of the *lysC* mRNA in the context of wild-type (WT) *E. coli* strain grown at 30°C. The strain was grown to mid-log phase in M63 glucose minimal medium with 0.2% glucose at 30°C. Total RNA was isolated at the indicated times before (0-) and after (0+) addition of lysine (10  $\mu$ g/ml). The 16S rRNA was used as a loading control.

(B) Northern blots analysis of the *lysC* mRNA in the context of the wild-type (WT) *E. coli* strain grown at 30°C followed by a temperature shift at 44°C. Bacterial growth culture and RNA extractions were performed as described in (A). Cells were incubated at 30°C from 0 to 4 min and at 44°C from 4 to 24 min. The 16S rRNA was used as a loading control. The absence of 5S rRNA intermediates suggests that RNase E is still active in these conditions at 44°C (9), which is in contrast to what was obtained in the *rne-3071* (RNase E(TS)) strain (Fig. 2F).

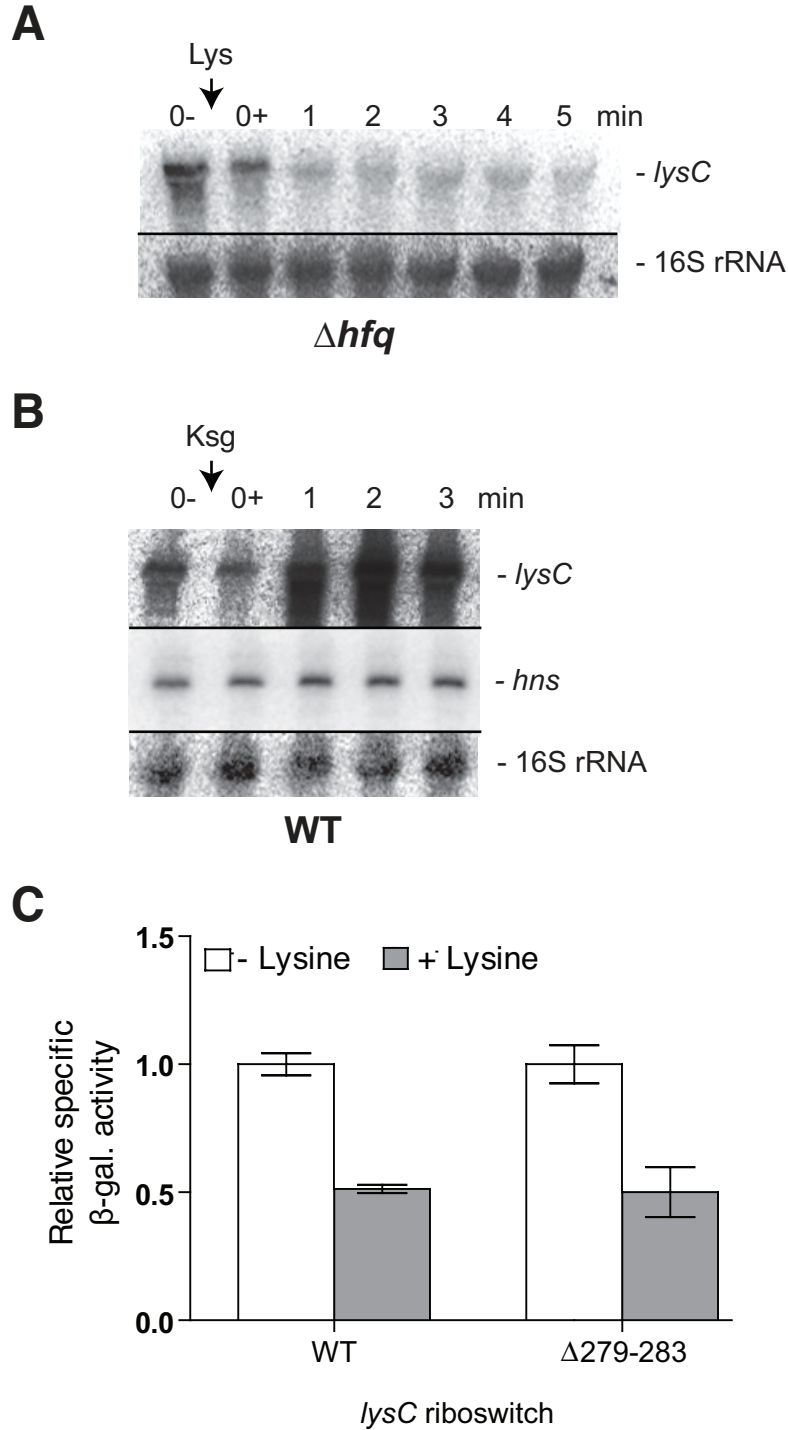

**Fig. S8.** Investigation of various *cis*- and *trans*-acting factors potentially involved in *lysC* mechanism.

(A) Northern blot analysis of the *lysC* mRNA in *hfq* mutant strain (10) grown at 37°C to mid-log phase in M63 0.2% glucose minimal media. Total RNA was isolated at the indicated times before (0-) and after (0+) addition of lysine (10  $\mu$ g/ml). The 16S rRNA was used as a loading control.

(B) Northern blot analysis of the *lysC* mRNA grown in M63 minimal medium with 0.2% glucose at 37°C to mid-log phase as a function of kasugamycin (500  $\mu\text{g/ml}$ ). Total RNA was isolated at the indicated times before (0-) and after (0+) addition of kasugamycin (Ksg), which specifically blocks ribosomes at the RBS (11). These results are consistent with the idea that ribosome stalling at the RBS of the *lysC* mRNA prevents RNase E cleavages in the riboswitch domain, resulting the in accumulation of the *lysC* mRNA at 1-3 min. The *hns* mRNA was used as a negative control. The 16S rRNA was used as a loading control.

(C)  $\beta$ -galactosidase assays of transcriptional *lysC-lacZ* fusions for the mutant  $\Delta 279-283$  (see Fig. S2 for construct). Enzymatic activities were measured in absence and presence of 10  $\mu\text{g/ml}$  lysine. Values were normalized to the enzymatic activity obtained for the WT in absence of lysine. The average values of three independent experiments with standard deviations are shown.

**Table S1.** Summary of strains or plasmids used in this study.

| Strains | Relevant marker                                                                         | References                                      |
|---------|-----------------------------------------------------------------------------------------|-------------------------------------------------|
| EM1055  | MG1655 $\Delta lacZ$ X174                                                               | (14)                                            |
| EM1277  | EM1055 <i>rne-3071</i> (Ts) <i>zce-726::Tn10</i>                                        | (13)                                            |
| EM1377  | EM1055 <i>rne131 zce-726::Tn10</i>                                                      | (13)                                            |
| EM1047  | DH5 $\alpha$ + pACYC184                                                                 | Laboratory collection                           |
| PM1205  | <i>lacI'::P<sub>BAD</sub>-cat-sacB-lacZ</i> , mini $\lambda$ tet <sup>R</sup>           | (2)                                             |
| EM1237  | DY330 [W3110 delta-lacU169 gal490 lambda-clI857 delta-( <i>cro-bioA</i> )]              | (1)                                             |
| HFS10   | <i>supE44 hsdR thi-1 thr-1 leuB6 lacY1 tonA21 recD1009 <math>\Delta hfq::cat</math></i> | (10)                                            |
| EM1264  | EM1055 $\Delta hfq::cat$                                                                | This study EM1055+P1 HFS10                      |
| MPC58   | EM1237 $\Delta lysC::cat$                                                               | This study                                      |
| MPC59   | EM1055 $\Delta lysC::cat$                                                               | This study EM1055+P1 $\Delta lysC::cat$ (MPC58) |
| MPC66   | EM1055 $\Delta lysC::cat$ pBAD <i>lysC</i> - $\Delta$ Site1                             | This study                                      |
| MPC70   | EM1055 $\Delta lysC::cat$ pBAD <i>lysC</i> -WT                                          | This study                                      |
| MPC7    | PM1205 <i>lacI'::P<sub>BAD</sub>-LysC-LacZ</i>                                          | This study                                      |
| MPC16   | PM1205 <i>lacI'::P<sub>BAD</sub>-lysC-lacZ</i>                                          | This study                                      |
| MPC19   | PM1205 <i>lacI'::P<sub>BAD</sub>-LysC-mutON-LacZ</i>                                    | This study                                      |
| MPC20   | PM1205 <i>lacI'::P<sub>BAD</sub>-LysC-mutOFF-LacZ</i>                                   | This study                                      |
| MPC24   | PM1205 <i>lacI'::P<sub>BAD</sub>-lysC<sub>AUG</sub>-lacZ</i>                            | This study                                      |
| MPC25   | PM1205 <i>lacI'::P<sub>BAD</sub>-lysC-mutON-lacZ</i>                                    | This study                                      |
| MPC26   | PM1205 <i>lacI'::P<sub>BAD</sub>-lysC-mutOFF-lacZ</i>                                   | This study                                      |
| MPC29   | PM1205 <i>lacI'::P<sub>2lysC</sub>P<sub>1lysC</sub>-lacZ</i>                            | This study                                      |
| MPC30   | PM1205 <i>lacI'::P<sub>2lysC</sub>-lacZ</i>                                             | This study                                      |
| MPC40   | PM1205 <i>lacI'::P<sub>BAD</sub>-LysC-G31C-LacZ</i>                                     | This study                                      |
| MPC41   | PM1205 <i>lacI'::P<sub>BAD</sub>-lysC-<math>\Delta</math>Site1-2-lacZ</i>               | This study                                      |
| MPC42   | PM1205 <i>lacI'::P<sub>BAD</sub>-LysC-<math>\Delta</math>Site1-2-LacZ</i>               | This study                                      |
| MPC43   | PM1205 <i>lacI'::P<sub>BAD</sub>-lysC-G31C-lacZ</i>                                     | This study                                      |
| MPC44   | PM1205 <i>lacI'::P<sub>BAD</sub>-lysC-mutAAG-lacZ</i>                                   | This study                                      |
| MPC45   | PM1205 <i>lacI'::P<sub>BAD</sub>-lysC-mutGACG-lacZ</i>                                  | This study                                      |
| MPC46   | PM1205 <i>lacI'::P<sub>BAD</sub>-LysC-mutAAG-LacZ</i>                                   | This study                                      |
| MPC47   | PM1205 <i>lacI'::P<sub>BAD</sub>-LysC-mutGACG-LacZ</i>                                  | This study                                      |
| MPC50   | PM1205 <i>lacI'::P<sub>BAD</sub>-lysC-<math>\Delta</math>Site1-lacZ</i>                 | This study                                      |
| MPC51   | PM1205 <i>lacI'::P<sub>BAD</sub>-LysC-<math>\Delta</math>Site2-LacZ</i>                 | This study                                      |
| MPC52   | PM1205 <i>lacI'::P<sub>BAD</sub>-lysC-<math>\Delta</math>Site2-lacZ</i>                 | This study                                      |
| MPC53   | PM1205 <i>lacI'::P<sub>BAD</sub>-LysC-<math>\Delta</math>Site1-LacZ</i>                 | This study                                      |
| TPP3    | PM1205 <i>lacI'::P<sub>BAD</sub>-thiM-lacZ</i>                                          | This study                                      |
| TPP4    | PM1205 <i>lacI'::P<sub>BAD</sub>-ThiM-LacZ</i>                                          | This study                                      |
| TPP5    | PM1205 <i>lacI'::P<sub>BAD</sub>-thiM<sub>300</sub>-lacZ</i>                            | This study                                      |



| <b>Plasmids</b>                   | <b>Relevant marker</b>                                               | <b>References</b> |
|-----------------------------------|----------------------------------------------------------------------|-------------------|
| pNM12                             | pBAD24 derivative                                                    | (12)              |
| pBAD <i>lysC</i> - $\Delta$ Site1 | pBAD24 + <i>lysC</i> - $\Delta$ Site1 (arabinose inducible promoter) | This study        |
| pBAD <i>lysC</i> -WT              | pBAD24 + <i>lysC</i> (arabinose inducible promoter)                  | This study        |

**Table S2.** Summary of oligonucleotides used in this study.

| Oligonucleotides | Sequence 5'-3'                                                                           |
|------------------|------------------------------------------------------------------------------------------|
| EM168            | TCACACTTTGCTATGCCATAGC                                                                   |
| EM169            | CTGCAGGTCGACTCTAGAGG                                                                     |
| EM192            | TAATACGACTCACTATAGGGAGATGCCTGGCAGTTCCTACTC                                               |
| EM193            | TGCCTGGCGGCAGTAGCG                                                                       |
| EM293            | TAATACGACTCACTATAGGGAGACGCTTTACGCCAGTAATTCC                                              |
| EM294            | CTCCTACGGGAGGCAGCAGT                                                                     |
| EM411            | ACATCCGTA CTCTTCGTGCG                                                                    |
| EM412            | TGTAATACGACTCACTATAGGAGTCCAGGTTTTAGTTTCGCC                                               |
| EM649            | TGTAATACGACTCACTATAGTCCACCACTTGCGAAACGCC                                                 |
| EM656            | CAAGTAACGGTGTGGAGGA                                                                      |
| EM674            | CATTCAATGCCCCATTTGCG                                                                     |
| EM675            | TGTAATACGACTCACTATAGCCAAAAAGTTAAGGACGTGG                                                 |
| EM703            | GATTTATCATCGCAACCAAAC                                                                    |
| EM704            | TGTAATACGACTCACTATAGCTGCCATAACGTGAAGAAGC                                                 |
| EM840            | GAATCTGGTGTATATGGCGAGC                                                                   |
| EM841            | GGGGGATGTGCTGCAAGGC                                                                      |
| EM844            | TAACGCCAGGGTTTTCCAGTCACGACGTTGTAAAACGACCATAGCTGTTTCCTGT<br>GTGAGGCGTCAAATCAGCTACGCT      |
| EM845            | TAACGCCAGGGTTTTCCAGTCACGACGTTGTAAAACGACGGCGTCAAATCAGCT<br>ACGCT                          |
| EM908            | ACCTGACGCTTTTTATCGCAACTCTCTACTGTTTCTCCATGTACTACCTGCGCTAGC                                |
| EM991            | ACCTGACGCTTTTTATCGCAAC                                                                   |
| EM993            | GATCCGGCATTTTAACTTTCTTTATCACACAGGAAACAGCTATGG                                            |
| EM994            | TAACGCCAGGGTTTTCCAG                                                                      |
| EM1023           | TGTAATACGACTCACTATAGGTGAAAATAGTAGCGAAGTATCGC                                             |
| EM1024           | CATAACTACCTCGTGTCAGGG                                                                    |
| EM1065           | GGCGTCAAATCAGCTACGC                                                                      |
| EM1067           | CGGGTAGCAAACAGATCGAA                                                                     |
| EM1069           | TAAAGAAAGTTAAAATGCCGGATCGGGCGTCAAATCAGCTACGCT                                            |
| EM1094           | TAACGCCAGGGTTTTCCAGTCACGACGTTGTAAAACGACCATAGCTGTTTCCTGT<br>GTGACATGGCTACCTCGTGTCAGGGGATC |
| EM1098           | ACCTGACGCTTTTTATCGCAACTCTCTACTGTTTCTCCATTTTTACCCAGAAGAGG<br>CGCGTTGC                     |
| EM1099           | ACCTGACGCTTTTTATCGCAACTCTCTACTGTTTCTCCATGGTCTTCAGGCGCGTTG<br>CCCAAGTAAC                  |
| EM1101           | TGTAATACGACTCACTATAGGGTCTTCAGGCGCGTTGCCCAAGTAAC                                          |
| EM1102           | TAAAGAAAGTTAAAATGCCGGATCCATGGCTACCTCGTGTCAGGGGATC                                        |
| EM1166           | TAACGCCAGGGTTTTCCAGTCACGACGTTGTAAAACGACCATAGCTGTTTCCTGT<br>GTGAGCGCAGGTAGTACATTTAT       |
| EM1167           | TAAAGAAAGTTAAAATGCCGGATCGCGCAGGTAGTACATTTAT                                              |

EM1168 TAACGCCAGGGTTTTCCAGTCACGACGTTGTAAAACGACCATAGCTGTTTCCTGT  
GTGAGGCGGTTCAGTAGTTCAGC

EM1169 TAAAGAAAGTTAAAATGCCGGATCGGCGGTTCAGTAGTTCAGC

EM1337 GCGCAGGCCAGAAGACGC

EM1338 GCGTCTTCTGGCCTGCGC

EM1339 ACAGTAGAGAGTTGCGATAAAAAGCGTCGATGGTGCCCTCAGTGAGCC

EM1363 GGCCACGCGTCGACTAGTACTTTTTTTTTTTTTTTTTT

EM1364 GGCCACGCGTCGACTAGTAC

EM1372 TGTAATACGACTCACTATAGGGGTTTTACCCAGAAGAGGCGCGTTGC

EM1444 CGTACGCTGGTACCGCC

EM1467 GTATCGCTCTGCGCCACCCGCCGCCCTTGTGCCAAGGCTGAAAATG

EM1468 CATTTTCAGCCTTGGCACAAGGGGCGGCGGGTGGGCGCAGAGCGATAC

EM1492 CACGAGGTAGTTAAGTCTGAAATTG

EM1493 CAATTTTCAGACTTAACTACCTCGTG

EM1494 TCCCCTGACACGACGTAGTTATGTCTG

EM1495 CAGACATAACTACGTTCGTGTCAGGGGA

EM1552 TGTAATACGACTCACTATAGGCCAGAAGAGGCGCGTTGC

EM1652 CGTAACGTCTTTCATTTTCATCG

EM1683 CGCTCTGCGCCACCCGCCGCTCTTCCCTTGTGCCAAGG

EM1684 CCTTGGCACAAGGGAAGAGCGGCGGGTGGGCGCAGAGCG

EM1685 CTGCGCCACCCGTCTTCCGCCCTTGTGCCAAGGCTG

EM1686 CAGCCTTGGCACAAGGGGCGGAAGACGGGTGGGCGCAG

EM1687 TAACGCCAGGGTTTTCCAGTCACGACGTTGTAAAACGACCATAGCTGTTTCCTGT  
GTGACAGCAGGTCGACTTGCATAGTTTG

EM1688 TAACGCCAGGGTTTTCCAGTCACGACGTTGTAAAACGACCAGCAGGTCGACTTGC  
ATAGTTTG

EM1701 TAAAGAAAGTTAAAATGCCGGATCCAGCAGGTCGACTTGCATAGTTTG

EM1729 CCATGTACTACCTGCGCTAGC

EM1742 CGCCAGTCACAGAAAATGTGATGGTTTTAGTGCCGTTAGACCAGCAATAGACATA  
AGCG

EM1743 CGTTTATTGATGAGCATAGTGACAAGAAAATCAATACGGTGTGACGGAAGATCACT  
TCG

EM1786 ACCTGACGCTTTTTATCGCAACTCTCTACTGTTTCTCCATGATTTATCATCGCAACCA  
AAC

EM1787 TGTAATACGACTCACTATAGCCAAGCGTCGTTGTACGAC

EM1788 CGGCGAGCTGATGTCGAC

LB1 GTGTGATAAAGAAAGTTAAAATGCCGGATCTGGATCAAGCGTCCAGGGTGT

MSR1 TAATACGACTCACTATAGGGGAACGGAGGAAACCAAATCCATC

MSR2 ATGAATCTTACCGAATTAAG

---

**Table S3.** Summary of *lacZ* fusions used in this study.

| Strains | Relevant marker                                                   | Oligonucleotides                                                                                                          |
|---------|-------------------------------------------------------------------|---------------------------------------------------------------------------------------------------------------------------|
| MPC7    | PM1205 <i>lacI'</i> ::P <sub>BAD</sub> -LysC-LacZ                 | EM845-EM908 (genomic DNA)                                                                                                 |
| MPC16   | PM1205 <i>lacI'</i> ::P <sub>BAD</sub> -lysC-lacZ                 | PCR1: EM908-EM844 (genomic DNA)<br>PCR2: EM991-EM1069 (PCR1)<br>PCR3: EM993-EM994 (PCR1)<br>PCR4: EM991-EM994 (PCR2-3)    |
| MPC19   | PM1205 <i>lacI'</i> ::P <sub>BAD</sub> -LysC-mutON-LacZ           | EM845-EM1099 (genomic DNA)                                                                                                |
| MPC20   | PM1205 <i>lacI'</i> ::P <sub>BAD</sub> -LysC-mutOFF-LacZ          | EM845-EM1098 (genomic DNA)                                                                                                |
| MPC24   | PM1205 <i>lacI'</i> ::P <sub>BAD</sub> -lysC <sub>AUG</sub> -lacZ | PCR1: EM1908-EM1094 (genomic DNA)<br>PCR2: EM991-EM1102 (PCR1)<br>PCR3: EM993-EM994 (PCR1)<br>PCR4: EM991-EM994 (PCR2-3)  |
| MPC25   | PM1205 <i>lacI'</i> ::P <sub>BAD</sub> -lysC-mutON-lacZ           | PCR1: EM1099-EM844 (genomic DNA)<br>PCR2: EM991-EM1069 (PCR1)<br>PCR3: EM993-EM994 (PCR1)<br>PCR4: EM991-EM994 (PCR2-3)   |
| MPC26   | PM1205 <i>lacI'</i> ::P <sub>BAD</sub> -lysC-mutOFF-lacZ          | PCR1: EM1098-EM844 (genomic DNA)<br>PCR2: EM991-EM1069 (PCR1)<br>PCR3: EM993-EM994 (PCR1)<br>PCR4: EM991-EM994 (PCR2-3)   |
| MPC29   | PM1205 <i>lacI'</i> ::P <sub>2lysC</sub> P <sub>1lysC</sub> -lacZ | PCR1: EM846-EM1166 (genomic DNA)<br>PCR2: EM1067-EM1167 (PCR1)<br>PCR3: EM993-EM994 (PCR1)<br>PCR4: EM1067-EM994 (PCR2-3) |
| MPC30   | PM1205 <i>lacI'</i> ::P <sub>2lysC</sub> -lacZ                    | PCR1: EM846-EM1168 (genomic DNA)<br>PCR2: EM1067-EM1169 (PCR1)<br>PCR3: EM993-EM994 (PCR1)<br>PCR4: EM1067-EM994 (PCR2-3) |
| MPC40   | PM1205 <i>lacI'</i> ::P <sub>BAD</sub> -LysC-G31C-LacZ            | PCR1: EM991-EM1338 (From MPC7)<br>PCR2: EM994-EM1337 (From MPC7)<br>PCR3: EM991-EM994 (PCR1-2)                            |
| MPC41   | PM1205 <i>lacI'</i> ::P <sub>BAD</sub> -lysC-ΔSite1-2-lacZ        | PCR1: EM991-EM1468 (From MPC16)<br>PCR2: EM994-EM1467 (From MPC16)<br>PCR3: EM991-EM994 (PCR1-2)                          |
| MPC42   | PM1205 <i>lacI'</i> ::P <sub>BAD</sub> -LysC-ΔSite1-2-LacZ        | PCR1: EM991-EM1468 (From MPC7)<br>PCR2: EM994-EM1467 (From MPC7)<br>PCR3: EM991-EM994 (PCR1-2)                            |
| MPC43   | PM1205 <i>lacI'</i> ::P <sub>BAD</sub> -lysC-G31C-lacZ            | PCR1: EM991-EM1338 (From MPC16)<br>PCR2: EM994-EM1337 (From MPC16)<br>PCR3: EM991-EM994 (PCR1-2)                          |
| MPC44   | PM1205 <i>lacI'</i> ::P <sub>BAD</sub> -lysC-mutAAG-lacZ          | PCR1: EM991-EM1493 (From MPC16)<br>PCR2: EM994-EM1492 (From MPC16)<br>PCR3: EM991-EM994 (PCR1-2)                          |

|       |                                                                                            |                                                                                                                      |
|-------|--------------------------------------------------------------------------------------------|----------------------------------------------------------------------------------------------------------------------|
| MPC45 | PM1205 <i>lacI'</i> ::P <sub>BAD</sub> - <i>lysC</i> -mutGACG- <i>lacZ</i>                 | PCR1: EM991-EM1495 (From MPC16)<br>PCR2: EM994-EM1494 (From MPC16)<br>PCR3: EM991-EM994 (PCR1-2)                     |
| MPC46 | PM1205 <i>lacI'</i> ::P <sub>BAD</sub> - <i>LysC</i> -mutAAG- <i>LacZ</i>                  | PCR1: EM991-EM1493 (From MPC7)<br>PCR2: EM994-EM1492 (From MPC7)<br>PCR3: EM991-EM994 (PCR1-2)                       |
| MPC47 | PM1205 <i>lacI'</i> ::P <sub>BAD</sub> - <i>LysC</i> -mutGACG- <i>LacZ</i>                 | PCR1: EM991-EM1495 (From MPC7)<br>PCR2: EM994-EM1494 (From MPC7)<br>PCR3: EM991-EM994 (PCR1-2)                       |
| MPC50 | PM1205 <i>lacI'</i> ::P <sub>BAD</sub> - <i>lysC</i> - $\Delta$ <i>Site1</i> - <i>lacZ</i> | PCR1:EM991-EM1684 (From MPC16)<br>PCR2:EM994-EM1683 (From MPC16)<br>PCR3:EM991-EM994 (PCR1-2)                        |
| MPC51 | PM1205 <i>lacI'</i> ::P <sub>BAD</sub> - <i>LysC</i> - $\Delta$ <i>Site2</i> - <i>LacZ</i> | PCR1:EM991-EM1684 (From MPC7)<br>PCR2:EM994-EM1683 (From MPC7)<br>PCR3:EM991-EM994 (PCR1-2)                          |
| MPC52 | PM1205 <i>lacI'</i> ::P <sub>BAD</sub> - <i>lysC</i> - $\Delta$ <i>Site2</i> - <i>lacZ</i> | PCR1:EM991-EM1686 (From MPC16)<br>PCR2:EM994-EM1685 (From MPC16)<br>PCR3:EM991-EM994 (PCR1-2)                        |
| MPC53 | PM1205 <i>lacI'</i> ::P <sub>BAD</sub> - <i>LysC</i> - $\Delta$ <i>Site1</i> - <i>LacZ</i> | PCR1:EM991-EM1686 (From MPC7)<br>PCR2:EM994-EM1685 (From MPC7)<br>PCR3:EM991-EM994 (PCR1-2)                          |
| TPP3  | PM1205 <i>lacI'</i> ::P <sub>BAD</sub> - <i>thiM</i> - <i>lacZ</i>                         | PCR1: EM1786-EM1687 (genomic DNA)<br>PCR2:EM991-EM1701 (PCR1)<br>PCR3:EM993-EM994 (PCR1)<br>PCR4:E991-EM994 (PCR2-3) |
| TPP4  | PM1205 <i>lacI'</i> ::P <sub>BAD</sub> - <i>ThiM</i> - <i>LacZ</i>                         | EM1688-EM1786 (genomic DNA)                                                                                          |
| TPP5  | PM1205 <i>lacI'</i> ::P <sub>BAD</sub> - <i>thiM</i> <sub>300</sub> - <i>lacZ</i>          | PCR1: EM1786-LB1 (genomic DNA)<br>PCR2:EM991-EM1701 (PCR1)<br>PCR3:EM993-EM994 (PCR1)<br>PCR4:E991-EM994 (PCR2-3)    |

---

**Table S4.** PCR constructs used for *in vitro* RNA synthesis.

| <b>Constructions</b>               | <b>Oligonucleotides</b>                                                                  |
|------------------------------------|------------------------------------------------------------------------------------------|
| <i>lysC</i> - expression platform  | EM1023-EM1024                                                                            |
| <i>lysC</i> -ON mutant structure   | EM1065-EM1101                                                                            |
| <i>lysC</i> -OFF mutant structure  | EM1065-EM1372                                                                            |
| <i>lysC</i> -WT structure          | EM1065-EM1552                                                                            |
| <i>lysC</i> - $\Delta$ Site1-2     | PCR1: EM1065-EM1467<br>PCR2: EM1552-EM1468<br>PCR3: EM1065-EM1552                        |
| <i>lysC</i> - $\Delta$ Site1-2/OFF | PCR1: EM1065-EM1372<br>PCR2: EM1372-EM1468<br>PCR3: EM1065-EM1467<br>PCR4: EM1065-EM1372 |
| <i>lysC</i> -G31C                  | PCR1: EM1065-EM1337<br>PCR2: EM1552-EM1338<br>PCR3: EM1065-EM1552                        |
| <i>lysC</i> riboswitch RNA probe   | EM649-EM656                                                                              |
| <i>lysC</i> ORF RNA probe          | EM1787-EM1788                                                                            |
| <i>thiM</i> riboswitch RNA probe   | EM703-EM704                                                                              |
| <i>hns</i> ORF probe               | EM411-EM412                                                                              |
| <i>rho</i> ORF probe               | MSR1-MSR2                                                                                |
| 16S rRNA probe                     | EM293-EM294                                                                              |
| 5S rRNA probe                      | EM192-EM193                                                                              |
